# Supplementary material for: Genome-Wide Analysis of ZmDREB Genes and Their Association with Natural Variation in Drought Tolerance at Seedling Stage of Zea mays L
Source: PLoS Genet. 2013 Sep 26;9(9):e1003790. doi: 10.1371/journal.pgen.1003790 (PMC3784558; doi:10.1371/journal.pgen.1003790)
Supplement: Table S7 — Percentage of phenotypic variation explained by the favorable allele of ZmDREB2.7. The phenotypic variation for plant drought tolerance attributed to each polymorphism was calculated using MLM, as described in Materials and Methods. The favorable allele at each locus is underlined. (XLS) [file pgen.1003790.s013.xls]

## Sheet: table
Table S7. Percentage of phenotypic variaition explained by the favorable allele of ZmDREB2.7.
The phenotypic variation for plant drought tolerance explained by each polymorphism was calculated using MLM, as described in Materials and Methods. The favorable allele at each locus is underlined.
Polymorphism	Location	Allele	Frequency	P value	R2 (%)
SNP-503	Promoter	A/C	60/45	0.00166126	6.67781
SNP-260	Promoter	C/T	60/45	0.00166126	6.67781
INDEL-185	Promoter	0/3	60/45	0.00166126	6.67781
INDEL-154	Promoter	1/0	60/45	0.00166126	6.67781
SNP-150	Promoter	G/C	60/45	0.00166126	6.67781
